# Supplementary material for: Characterization of Bordetella pertussis Strains Isolated from India
Source: MDPI journal article supplement (doi:10.3390/pathogens11070794), 2022-07-14
Supplement: s1 [file s1]

**Table S1.** Primers used in the PCR amplification for identification of *B. pertussis* genes.

| Gene   | Primer Sequence                                           |
|--------|-----------------------------------------------------------|
| Prn    | F: GCCAATGTCACGGTCCAA<br>R: CGGATTCAGGCGCAACTC            |
| PtxP   | F: AATCGTCCTGCTCAACCGCC<br>R: GGTATACGGTGGCGGGAGGA        |
| Fim2   | F: GCATAGACCATCTTGTATG<br>R: CCGGCCGGGCTCCTTGAG           |
| Fim3   | F: CCCCCGGACCTGATATTGTGATG<br>R: GCTGAGCGTGCTGAAGGACAAGAT |
| PtxS1  | F: ACCATCAAAACGCAGAGGGGAAGA<br>R: AGGAGGGCCAACGGCAGA      |
| cyaA   | F: ACCGCCTACGGCAAGCGC<br>R: GCCGCCTTCAAGGGTATC            |
| TcfA   | F: ATGCACATTTACGGAAATATGA<br>R: TATGCGTGCCCGGGTCATAG      |
| ompQ   | F: ATGCGTCGTCTTCTCGTC<br>R: TCAGAAGCGCTGGGTCAT            |
| BapC   | F: GACAACGGTGTCTGGGGC<br>R: GCGCAGGTGGAACGTCCA            |
| FHA    | F: TCGCCATTTTCGGCGCACG<br>R: AGATCGAGCTGCGCGCCG           |
| Vag8   | F: ATGGCAGGACAAGCGAGG<br>R: CCGCGTACCCGTCAACGT            |
| Adk    | F: AGCCGCCTTTCTCACCCAACACT<br>R: TGGGCCCAGGACGAGTAGT      |
| BrkA   | F: CCTGCTCGGCTACACCTATGC<br>R: CCTGGCGGGGTTTTTCATTG       |
| IS481  | F: GCCGGATGAACACCCATAAG<br>R: GCGATCAATTGCTGGACCAT        |
| IS1001 | F: AATTGCTGCAAGCCAACCA<br>R: CCAGAGCCGTTTGAGTTCGT         |
| IS1002 | F: CTAGGTCGAGCCCTTCTTGTTAAC<br>R: GCGGGCAAGCCACTTGTA      |
